# Supplementary material for: Facile synthesis of pH-responsive doxorubicin-loaded layered double hydroxide for efficient cancer therapy
Source: Royal Society of Chemistry journal article supplement (doi:10.1039/c8tb01572d), 2018-01-01
Supplement: c8tb01572d1.pdf [file c8tb01572d1.pdf]

## Supporting Information

### **Facile Synthesis of pH-Responsive Doxorubicin-Loaded Layered Doubled Hydroxide for Efficient Cancer Therapy**

Abdul Hakeem,<sup>‡</sup> Guiting Zhan,<sup>‡</sup> Qingbo Xu, Tuying Yong, Lu Gan,<sup>\*</sup> and Xiangliang Yang

*National Engineering Research Center for Nanomedicine, Hubei Key Laboratory of Bioinorganic Chemistry and Materia Medica, College of Life Science and Technology, Huazhong University of Science and Technology, Wuhan 430074, China. \*E-mail: [lugan@mail.hust.edu.cn](mailto:lugan@mail.hust.edu.cn)*

<sup>‡</sup> These authors contributed equally to this paper.

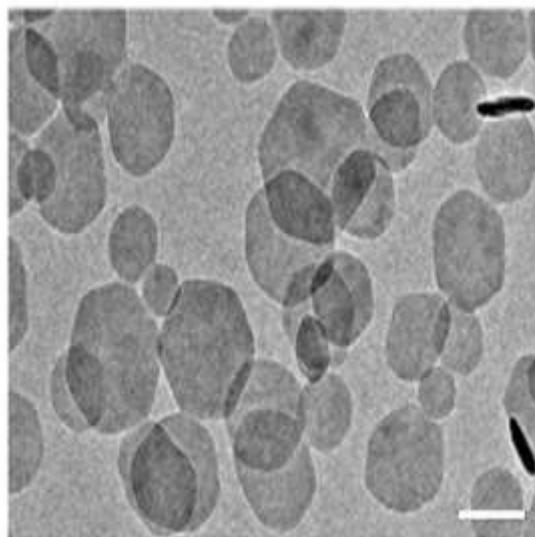

Fig. S1 TEM images of DOX@MgAl-LDH after after incubation in DMEM medium for 24 h. Scale bar: 100 nm.

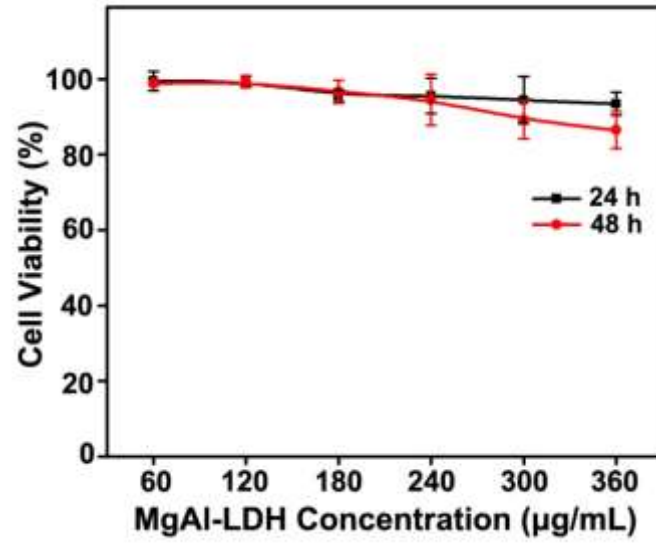

Fig. S2 Cell viability of NIH3T3 cells incubated with different concentrations of MgAl-LDH for different time periods. Data as mean value $\pm$ SD (n=6). \*\* $P$ <0.01. \*\*\* $P$ <0.001.
